# Supplementary material
Source: PubMed Central journal article supplement (PMC2572975)
Supplement: 0803171105_0803171105SI.pdf [file 0803171105_0803171105SI.pdf]

# Supporting Information

Honma *et al.* 10.1073/pnas.08031711105

## SI Methods

Mice were injected in the left hind footpad with  $1 \times 10^6$  promastigotes of *Leishmania major* MHOM/S U/73-5-ASKH strain. The thickness of the infected and contralateral uninfected footpad was measured as described (1).

To measure the immune responses to pathogens, draining popliteal lymph node cells ( $3\text{--}10 \times 10^4$ ) were cultured in the presence of *L. major* antigen for 48 h as described (1).

1. Tominaga N, *et al.* (2003) Development of Th1 and not Th2 immune responses in mice lacking IFN-regulatory factor-4. *Int Immunol* 15:1–10.



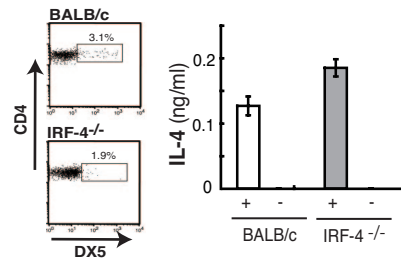

**Fig. 52.** CD4<sup>+</sup> NK T cells from IRF-4<sup>-/-</sup> mice produce IL-4 in response to  $\alpha$ -GalCer. (*Left*) Splenic CD4<sup>+</sup> T cells were stained with FITC-anti-CD4 and with biotin-anti-DX5 mAb plus streptavidin-phycoerythrin and analyzed by using FACS Aria. The proportion of cells within the square is indicated. (*Right*) Sorted CD4<sup>+</sup>DX5<sup>+</sup> cells ( $5 \times 10^4$ ) from BALB/c (open bar) and IRF-4<sup>-/-</sup> (filled bar) mice were cultured with splenic dendritic cells (CD11c<sup>+</sup> cells,  $1 \times 10^4$ ) in the presence (+) and absence (-) of  $\alpha$ -GalCer (200 ng/ml) for 48 h. The cytokine levels in the supernatant were determined by ELISA. The purity of CD4<sup>+</sup>DX5<sup>+</sup> cells from BALB/c and IRF-4<sup>-/-</sup> mice was 93.3 and 70.6%, respectively. The lower purity of CD4<sup>+</sup>DX5<sup>+</sup> cells from IRF-4<sup>-/-</sup> mice was caused by the lower expression of DX5 marker and their small numbers.





**Table S1. Primer sequences used for real-time RT-PCR**

| Name          | 5' primer                | 3' primer             |
|---------------|--------------------------|-----------------------|
| IL-4          | TCATCGGCATTTTGAACGAG     | TTTGGCACATCCATCTCCG   |
| IL-5          | CTCTCAGCTGTGTCTGGGCC     | GCTTGTCAACAGAGCTCGGTG |
| IFN- $\gamma$ | GCATTCATGAGTATTGCCAAGTTT | GATTCCGGCAACAGCTGGT   |
| IRF-1         | ATTCCAACCAATCCCAGGG      | CTCCGGAACAGACAGGCATC  |
